# Supplementary material for: Carnosol suppresses patient-derived gastric tumor growth by targeting RSK2
Source: PubMed Central journal article supplement (PMC6188138; doi:10.18632/oncotarget.24409), 2018-02-06
Supplement: oncotarget-09-34200-s001.pdf [file oncotarget-09-34200-s001.pdf]

## Carnosol suppresses patient-derived gastric tumor growth by targeting RSK2

### SUPPLEMENTARY MATERIALS

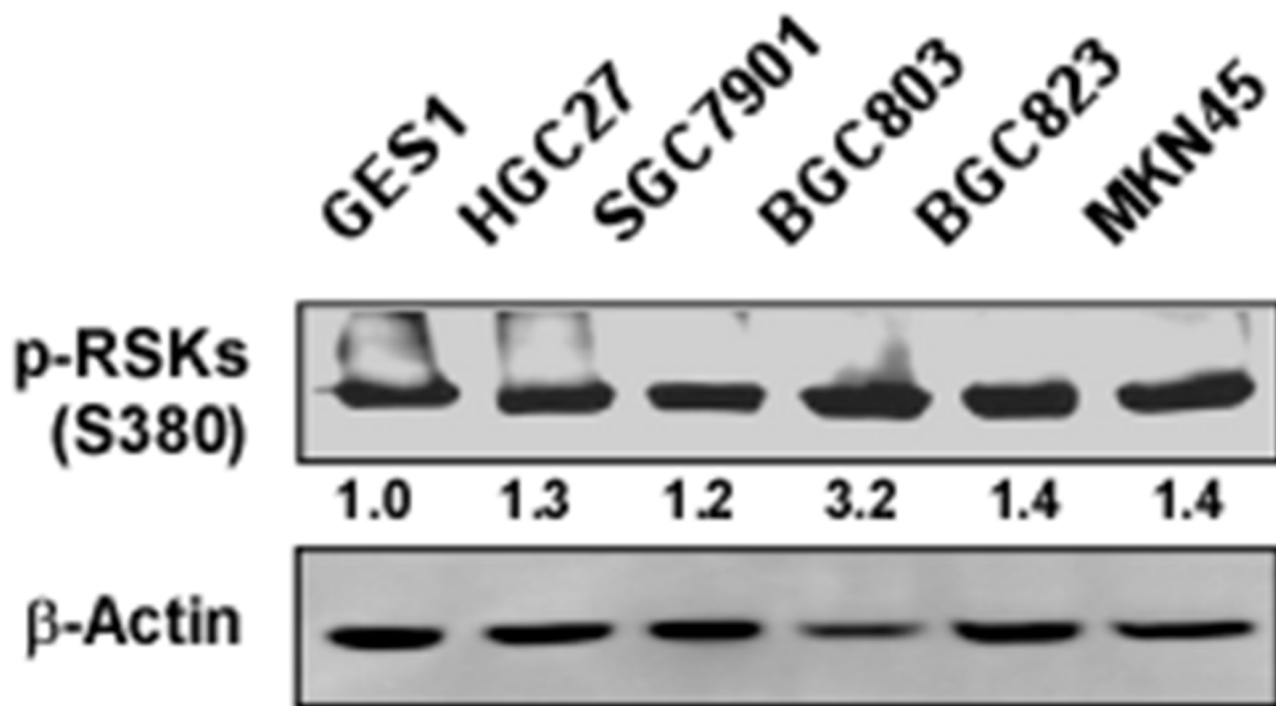

**Supplementary Figure 1: RSK activity in normal gastric cells and gastric cancer cells.** Expression of phosphorylated RSK proteins in normal gastric cells and gastric cancer cells was analyzed by Western blot. Band density was measured using the Image J (NIH) software program.

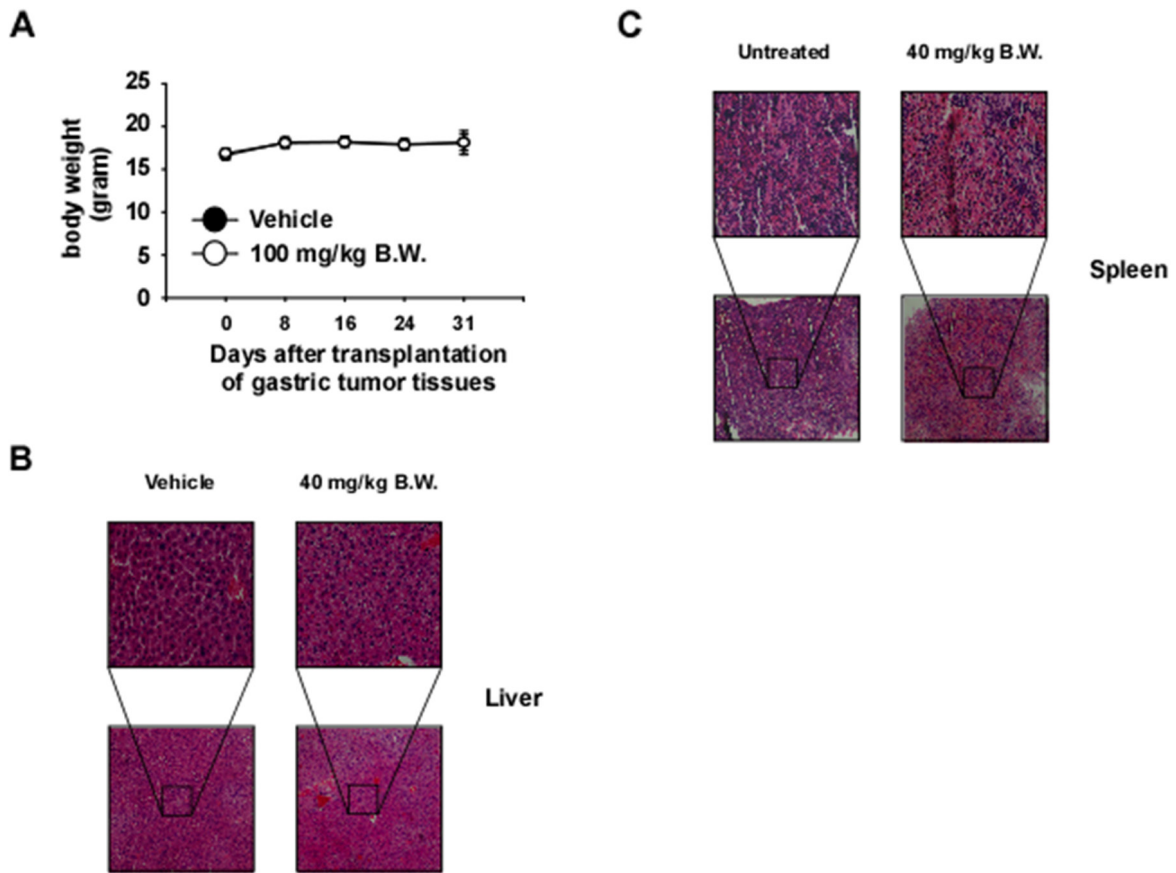

**Supplementary Figure 2: Carnosol has no toxic effects *in vivo*.** (A) Carnosol has no effect on mouse body weight. Body weights from treated or untreated groups of mice were obtained once a week over 31 days. (B-C) Immunohistochemistry analysis of liver and spleen tissues. Liver or spleen tissues from treated or untreated groups of mice were stained with H&E.
